# Supplementary material
Source: Research Square preprint supplement (doi:10.21203/rs.3.rs-10066808/v1)
Supplement: Supplementary file 1 [file a1ecd1f66b4904a24b753e4a.docx]

# Annexure-1: Socio-demographic details of the study population

|  | **N = 756** | **(%)** |
| --- | --- | --- |
| **Religion** | | |
| Hindu | 709 | 93.8 |
| Muslim | 47 | 6.2 |
| **Caste** | | |
| General | 63 | 8.3 |
| OBC | 489 | 64.7 |
| SC | 66 | 8.7 |
| ST | 135 | 17.9 |
| Don't know | 3 | 0.4 |
| **Type of card** | | |
| APL | 258 | 34.1 |
| BPL | 473 | 62.6 |
| Antyoday card | 6 | 0.8 |
| None | 19 | 2.6 |
| **Type of family** | | |
| Nuclear | 205 | 27.1 |
| Joint | 485 | 64.2 |
| Three generation family | 66 | 8.7 |
| **Mothers’ education** | | |
| Illiterate | 242 | 32.0 |
| Non-formal education | 33 | 4.4 |
| Primary | 304 | 40.2 |
| Secondary | 109 | 14.4 |
| Higher Secondary | 37 | 4.9 |
| Graduate and above | 31 | 4.1 |
| **Fathers’ education** | | |
| Illiterate | 82 | 10.8 |
| Non-formal education | 50 | 6.6 |
| Primary | 214 | 28.3 |
| Secondary | 224 | 29.6 |
| Higher Secondary | 114 | 15.1 |
| Graduate and above | 72 | 9.5 |
| **Mother’s Occupation** | | |
| Housewife | 604 | 79.9 |
| Labourer | 83 | 11.0 |
| Cultivation | 41 | 5.4 |
| Service | 12 | 1.6 |
| Occupation of caste | 10 | 1.3 |
| Business | 6 | 0.8 |
| **Father’s Occupation** | | |
| Labourer | 300 | 39.7 |
| Cultivation | 207 | 27.4 |
| Service | 106 | 14.0 |
| Business | 91 | 12.0 |
| Occupation of caste | 46 | 6.1 |
| Unemployed | 6 | 0.8 |
| **Tobacco addiction** | | |
| Mother’s Tobacco Addiction | 81 | 10.7 |
| Father’s Tobacco addiction | 291 | 38.5 |
| **Own house** | | |
| Yes | 708 | 93.7 |
| No | 48 | 6.3 |
| **Type of house** | | |
| Kuchcha House | 190 | 25.2 |
| Semi Pukka | 171 | 22.6 |
| Pucca house | 395 | 52.2 |
| **No. of rooms** | | |
| One room | 180 | 23.8 |
| One room and kitchen | 303 | 40.1 |
| Two rooms and kitchen | 220 | 29.1 |
| Three-room and kitchen | 53 | 7.0 |
| **Electricity** | | |
| Yes | 731 | 96.7 |
| No | 25 | 3.3 |
| **Fuel of kitchen** | | |
| Chulha | 445 | 58.9 |
| LPG | 292 | 38.6 |
| Stove | 9 | 1.2 |
| Gobar Gas plant | 6 | .8 |
| Smokeless Chulha | 4 | .5 |
| **Place of cooking** | | |
| Outdoor | 311 | 41.1 |
| Indoor separate room | 77 | 10.2 |
| Indoor no separate room | 368 | 48.7 |
| **Main source of drinking water** | | |
| Tap water | 571 | 75.5 |
| Well | 72 | 9.5 |
| Hand pump | 61 | 8.1 |
| R.O./ Filter | 52 | 6.9 |
| **Facility of toilet** | | |
| Yes | 533 | 70.5 |
| No | 223 | 29.5 |
| **Hand washing by** | | |
| Soap/ Powder | 596 | 78.8 |
| Water | 135 | 17.9 |
| Mud | 22 | 2.9 |
| Other | 3 | .4 |
| **Presence of animal/Livestock** | | |
| Yes | 344 | 45.5 |
| No | 412 | 54.5 |
| Total | 756 | 100 |
| **Agricultural land** | | |
| Yes | 418 | 55.3 |
| No | 338 | 44.7 |
| **Type of land** | **No. (n=418)** |  |
| Irrigated | 254 | 60.8 |
| Non-irrigated | 164 | 39.2 |
